# Supplementary material for: The incubation history of soil samples strongly affects the occlusion of particulate organic matter
Source: Copernicus journal article supplement (doi:10.5194/bg-22-4679-2025), 2025-09-15
Supplement: Supplementary file 1 [file Supplements.xlsx]

## Sheet: CCL by-sa
	This document is created by Fredi Büks and Markus Graf-Rosenfellner and published under the creative common license CCL by-sa.

## Sheet: Basic soil data
		Sample	Location	mean annual T	mean annual precipitation	Geology	Soil type	Land cover	Sand	Silt	Clay	Texture class	pH			SOM
				(°C)	(mm)		(WRB)		(mass%)	(mass%)	(mass%)	(KA6)	(-)			(g/kg dry soil)
		Loamy sand	Oranienburg (Germany)	11.8	572	Fluviatile sediments of the Weichselian glaciation	Cambisol	organic gardening, annual vegetables	82.1	12.8	5.1	Sl2	5.9	±	0.1	32.2	±	1.3
		Clayey silt	Langendorf (Germany)	11.7	568	Eolian loess and fluiviatile loamy deposits of the Saale river	Cambisol	organic gardening, annual vegetables	13.1	70.1	16.8	Ut3	7.1	±	0.1	19.7	±	2.1
		Silty loam	Tonndorf (Germany)	11.7	672	Transition zone between Triassic shell limestone and colored sandstone plus eolian glacial deposits	Cambisol	organic gardening, annual vegetables	18.3	60.7	21	Lu	6.9	±	0.1	18.4	±	2.2

## Sheet: Sonotrode calibration
		Heat capacity c (water)												Calibration of the ultrasonication device
		T	cH2O							As you can see, the heat capacity is nearly constant between 25 and 45°C. Apply the calibration procedure within this T range. Another advantage: At constant heat capacity, heat uptake by the water is increasing linearly with time. This means, that you can apply several sequential measurements with the same lot of water as long as you stay within this T range.
		[°C]	[J/kg*K]
		0	4.218
		5	4.203											The power of the sonotrode is calculated based on the ΔT between starting and end time of ultrasonication. Heating of deionized water appears in linear proportion to the time of ultrasonication. The slope of the gradient is proportional to the power of the sonotrode. During the calibration, water should have a temperature between 25 and 45°C, when heat capacity is nearly constant. Lines of both p…								P = power output of the sonotrode
		10	4.192																			mH2O = mass of water added to the DV
		15	4.185																			cH2O = isobaric heat capacity of water
		20	4.181																			WDewar = heat capacity of the DV
		25	4.179																			ΔT=heat difference after sonication
		30	4.177																			t=time of sonication
		35	4.177																			H=reaction enthalpy (here =0)
		40	4.177
		45	4.178
		50	4.18											Messung:
		55	4.182													1st parallel					2nd parallel
		60	4.184			These data of isobaric heat capacity are derived from VDI heat atlas and are nearly similar to other reference, e.g.: https://www.engineeringtoolbox.com/specific-heat-capacity-water-d_660.html								Datum:	2024-04-15	1	2	3	4	5	1	2	3	4	5
														m	[g]	299.98	299.95	300.05	300.06	300.02	299.99	300.08	300.06	299.99	300.01
		norm.	CH2O =	4.177										Tstart	[°C]	24.5	26.3	24.6	26.3	25.2	25.7	27.9	25.6	25.6	25.7
														Tend	[°C]	26.6	30.5	31.2	34.8	36.2	27.9	32.1	32.3	34.4	36.7
														cH2O	[J/g*K]	4.177	4.177	4.177	4.117	4.177	4.177	4.177	4.177	4.177	4.177
														ΔT	[K]	2.1	4.2	6.6	8.5	11	2.2	4.2	6.7	8.8	11
		Heat capacity Dewar vessel (DV)												t	[s]	60	120	180	240	300	60	120	180	240	300
														P	[J/s]	48.5543	48.5499	50.8772	48.5066	50.8726	50.868	48.5689	51.6496	50.868	50.871
														PØ	[J/s]	50.0186
														PØ (SD)	[J/s]	1.29034
		Meas.	Tcold	mcold	Twarm	mwarm	Tequ	Wdewar
		Nr.	[°C]	[g]	[°C]	[g]	[°C]	[J/K]
		1	27.4	202.02	47.9	201.07	36.8	147.9
		2	28.7	194.99	59	203.92	43	138.6
		3	28.1	225.64	57.5	165.69	39.6	134.8
		4	28.4	149.75	49.3	245.4	40.5	120
		5	29.7	199.14	41.3	199.4	35.1	124.5
		6	30.6	149.61	59.7	148.9	43.7	134.7
		7	29.9	149.35	68	148.7	47	138.9
		8	27.1	180.6	55.3	182.03	40.1	134.6
							MV	134.25	←This is the mean heat capacity of our DV
							SD	8.66537

## Sheet: Field capacity and SPT density
		treatment	sample	Empty ring	Ring + soil (pF 1.8)	Ring + soil (oven-dry)	soil (pF 1.8)	soil (oven-dry)	WHC* (mass%, PF 1.8)	mean value	standard daviation	bulk density	water (pF 1.8) in 1 g dry mass	Weight Soil (for USD)	Weight Soil (for WSA)				Density of added SPT solution
				[g]	[g]	[g]	[g]	[g]	[m%]	[m%]	[±%]	[g/cm³]	[ml]	[g]	[g]
		Loamy sand	A	171.97	302.34	272.53	130.37	100.56	29.644	30.1281	1.07869	1.0056	0.301281	26.0256	5.20512				General parameters
			B	159.93	300.15	267.83	140.22	107.9	29.9537			1.079							Initial weight soil dry mass:	20	g
			C	115.86	234.52	207.57	118.66	91.71	29.3861			0.9171							Volume SPT:	100	ml
			D	118.07	253.99	222.92	135.92	104.85	29.6328			1.0485							Density soil solution:	1	g/cm³
			E	187.88	305.5	276.97	117.62	89.09	32.0238			0.8909							Resulting density:	1.6	g/cm³
		Clayey silt	A	110.19	265.13	230.95	154.94	120.76	28.3041	27.8746	0.651934	1.2076	0.278746	25.5749	5.11498				Loamy sand
			B	105.6	258.51	225.19	152.91	119.59	27.8619			1.1959							Soil solution:	0.301281	ml/g
			C	109.76	259.78	227.63	150.02	117.87	27.2758			1.1787							Density of SPT solution:	1.69641	g/cm³
			D	107.63	253.02	220.58	145.39	112.95	28.7207			1.1295
			E	111.94	256.82	225.83	144.88	113.89	27.2105			1.1389							Clayey silt
																			Soil solution:	0.278746	ml/g
		Silty loam	A	110.17	229.36	203.77	119.19	93.6	27.3397	28.3411	0.910085	0.936	0.283411	25.6682	5.13364				Density of SPT solution:	1.6892	g/cm³
			B	107.52	228.27	202.1	120.75	94.58	27.6697			0.9458
			C	101.08	219.96	193.42	118.88	92.34	28.7416			0.9234							Soil solution:	0.283411	ml/g
			D	110.59	242.14	212.06	131.55	101.47	29.6442			1.0147							Density of SPT solution:	1.69069	g/cm³
			E	110.02	229.22	202.92	119.2	92.9	28.31			0.929
		*WHC=Water holding capacity

## Sheet: Sonication time
		Calculation of ultrasonication time
		Ultrasonication is a common tool to test the susceptibility of soil aggregate structure to mechanical stress and measure soil carbon pools. To help you with your work, we provide this open access sheet to calculate the sonication time needed for the application of a certain amount of mechanical stress (J/ml). The document is CCL by-sa (Frederick Büks) – feel free to optimize and share.
		The calculations are based on: North, P.: Towards an absolute measurement of soil structural stability using ultrasound, J. Soil Sci., 27, 451–459, https://doi.org/10.1111/j.1365-2389.1976.tb02014.x, 1976.
		Sense solution			(g/cm3)	1.6	← If you intend to have another density cut-off, please note here.
		power			(W)=(J/s)	50.0186	← Use the sheet „USD calibration“ to measure the power output of your sonotrode (imported from sheet „calibration“).
		sd +/-			(W)=(J/s)	1.29034	← This is the standard deviation given by your calibration parallels. It should be <1.5 J/s (imported from sheet „calibration“).
		calibration			(date)	2024-04-15	← Please note the date of calibration and do not forget to attach a new sheet with every new calibration.
		Soil	Treatment	Sample	q	Flask	Soil (dry mass)	water	Flask, soil, water	Dense solution	Needed density	Flask, soil water, dense solution	Result. solution	Volume solution	Volume soil (dry mass)	Total volume	Q	sonication time
					(J/ml)	(g)	(g)	(g, ml)	(g)	(ml)	(g/cm-3)	(g)	(g)	(ml, cm³)	(ml, cm³)	(ml, cm³)	[J]	[s]	[min,s]
		Loamy sand	field fresh	A	0	24.38	20	6.02	50.4	100	1.69641	220.041	175.661	109.788	7.54717	117.335	0	0	0
				A	50	24.38	20	6.02	50.4	100	1.69641	220.041	175.661	109.788	7.54717	117.335	5866.76	117	1.57
				B	0	22.61	20	6.02	48.63	100	1.69641	218.271	175.661	109.788	7.54717	117.335	0	0	0
				B	50	22.61	20	6.02	48.63	100	1.69641	218.271	175.661	109.788	7.54717	117.335	5866.76	117	1.57
				C	0	22.65	20	6.02	48.67	100	1.69641	218.311	175.661	109.788	7.54717	117.335	0	0	0
				C	50	22.65	20	6.02	48.67	100	1.69641	218.311	175.661	109.788	7.54717	117.335	5866.76	117	1.57
				D	0	22.28	20	6.02	48.3	100	1.69641	217.941	175.661	109.788	7.54717	117.335	0	0	0
				D	50	22.28	20	6.02	48.3	100	1.69641	217.941	175.661	109.788	7.54717	117.335	5866.76	117	1.57
				E	0	22.82	20	6.02	48.84	100	1.69641	218.481	175.661	109.788	7.54717	117.335	0	0	0
				E	50	22.82	20	6.02	48.84	100	1.69641	218.481	175.661	109.788	7.54717	117.335	5866.76	117	1.57
			0 weeks	A	0	23.03	20	6.02	49.05	100	1.69641	218.691	175.661	109.788	7.54717	117.335	0	0	0
				A	50	23.03	20	6.02	49.05	100	1.69641	218.691	175.661	109.788	7.54717	117.335	5866.76	117	1.57
				B	0	24.72	20	6.02	50.74	100	1.69641	220.381	175.661	109.788	7.54717	117.335	0	0	0
				B	50	24.72	20	6.02	50.74	100	1.69641	220.381	175.661	109.788	7.54717	117.335	5866.76	117	1.57
				C	0	23.27	20	6.02	49.29	100	1.69641	218.931	175.661	109.788	7.54717	117.335	0	0	0
				C	50	23.27	20	6.02	49.29	100	1.69641	218.931	175.661	109.788	7.54717	117.335	5866.76	117	1.57
				D	0	23.09	20	6.02	49.11	100	1.69641	218.751	175.661	109.788	7.54717	117.335	0	0	0
				D	50	23.09	20	6.02	49.11	100	1.69641	218.751	175.661	109.788	7.54717	117.335	5866.76	117	1.57
				E	0	22.82	20	6.02	48.84	100	1.69641	218.481	175.661	109.788	7.54717	117.335	0	0	0
				E	50	22.82	20	6.02	48.84	100	1.69641	218.481	175.661	109.788	7.54717	117.335	5866.76	117	1.57
			1 week	A	0	22.85	20	6.02	48.87	100	1.69641	218.511	175.661	109.788	7.54717	117.335	0	0	0
				A	50	22.85	20	6.02	48.87	100	1.69641	218.511	175.661	109.788	7.54717	117.335	5866.76	117	1.57
				B	0	24.32	20	6.02	50.34	100	1.69641	219.981	175.661	109.788	7.54717	117.335	0	0	0
				B	50	24.32	20	6.02	50.34	100	1.69641	219.981	175.661	109.788	7.54717	117.335	5866.76	117	1.57
				C	0	22.71	20	6.02	48.73	100	1.69641	218.371	175.661	109.788	7.54717	117.335	0	0	0
				C	50	22.71	20	6.02	48.73	100	1.69641	218.371	175.661	109.788	7.54717	117.335	5866.76	117	1.57
				D	0	23.86	20	6.02	49.88	100	1.69641	219.521	175.661	109.788	7.54717	117.335	0	0	0
				D	50	23.86	20	6.02	49.88	100	1.69641	219.521	175.661	109.788	7.54717	117.335	5866.76	117	1.57
				E	0	24.14	20	6.02	50.16	100	1.69641	219.801	175.661	109.788	7.54717	117.335	0	0	0
				E	50	24.14	20	6.02	50.16	100	1.69641	219.801	175.661	109.788	7.54717	117.335	5866.76	117	1.57
			4 weeks	A	0	24.24	20	6.02	50.26	100	1.69641	219.901	175.661	109.788	7.54717	117.335	0	0	0
				A	50	24.24	20	6.02	50.26	100	1.69641	219.901	175.661	109.788	7.54717	117.335	5866.76	117	1.57
				B	0	23.01	20	6.02	49.03	100	1.69641	218.671	175.661	109.788	7.54717	117.335	0	0	0
				B	50	23.01	20	6.02	49.03	100	1.69641	218.671	175.661	109.788	7.54717	117.335	5866.76	117	1.57
				C	0	22.67	20	6.02	48.69	100	1.69641	218.331	175.661	109.788	7.54717	117.335	0	0	0
				C	50	22.67	20	6.02	48.69	100	1.69641	218.331	175.661	109.788	7.54717	117.335	5866.76	117	1.57
				D	0	23.06	20	6.02	49.08	100	1.69641	218.721	175.661	109.788	7.54717	117.335	0	0	0
				D	50	23.06	20	6.02	49.08	100	1.69641	218.721	175.661	109.788	7.54717	117.335	5866.76	117	1.57
				E	0	24.89	20	6.02	50.91	100	1.69641	220.551	175.661	109.788	7.54717	117.335	0	0	0
				E	50	24.89	20	6.02	50.91	100	1.69641	220.551	175.661	109.788	7.54717	117.335	5866.76	117	1.57
		Clayey silt	field fresh	A	0	22.1	20	5.66	47.76	100	1.6892	216.68	174.58	109.112	7.54717	116.66	0	0	0
				A	50	22.1	20	5.66	47.76	100	1.6892	216.68	174.58	109.112	7.54717	116.66	5832.98	117	1.57
				B	0	22.78	20	5.66	48.44	100	1.6892	217.36	174.58	109.112	7.54717	116.66	0	0	0
				B	50	22.78	20	5.66	48.44	100	1.6892	217.36	174.58	109.112	7.54717	116.66	5832.98	117	1.57
				C	0	22.76	20	5.66	48.42	100	1.6892	217.34	174.58	109.112	7.54717	116.66	0	0	0
				C	50	22.76	20	5.66	48.42	100	1.6892	217.34	174.58	109.112	7.54717	116.66	5832.98	117	1.57
				D	0	24.78	20	5.66	50.44	100	1.6892	219.36	174.58	109.112	7.54717	116.66	0	0	0
				D	50	24.78	20	5.66	50.44	100	1.6892	219.36	174.58	109.112	7.54717	116.66	5832.98	117	1.57
				E	0	24.04	20	5.66	49.7	100	1.6892	218.62	174.58	109.112	7.54717	116.66	0	0	0
				E	50	24.04	20	5.66	49.7	100	1.6892	218.62	174.58	109.112	7.54717	116.66	5832.98	117	1.57
			0 weeks	A	0	22.89	20	5.57	48.46	100	1.6892	217.38	174.49	109.056	7.54717	116.603	0	0	0
				A	50	22.89	20	5.57	48.46	100	1.6892	217.38	174.49	109.056	7.54717	116.603	5830.17	117	1.57
				B	0	24.71	20	5.57	50.28	100	1.6892	219.2	174.49	109.056	7.54717	116.603	0	0	0
				B	50	24.71	20	5.57	50.28	100	1.6892	219.2	174.49	109.056	7.54717	116.603	5830.17	117	1.57
				C	0	25.03	20	5.57	50.6	100	1.6892	219.52	174.49	109.056	7.54717	116.603	0	0	0
				C	50	25.03	20	5.57	50.6	100	1.6892	219.52	174.49	109.056	7.54717	116.603	5830.17	117	1.57
				D	0	22.82	20	5.57	48.39	100	1.6892	217.31	174.49	109.056	7.54717	116.603	0	0	0
				D	50	22.82	20	5.57	48.39	100	1.6892	217.31	174.49	109.056	7.54717	116.603	5830.17	117	1.57
				E	0	23.24	20	5.57	48.81	100	1.6892	217.73	174.49	109.056	7.54717	116.603	0	0	0
				E	50	23.24	20	5.57	48.81	100	1.6892	217.73	174.49	109.056	7.54717	116.603	5830.17	117	1.57
			1 week	A	0	23	20	5.57	48.57	100	1.6892	217.49	174.6	109.125	7.54717	116.672	0	0	0
				A	50	23	20	5.57	48.57	100	1.6892	217.49	174.6	109.125	7.54717	116.672	5833.6	117	1.57
				B	0	22.16	20	5.57	47.73	100	1.6892	216.65	171.94	107.462	7.54717	115.01	0	0	0
				B	50	22.16	20	5.57	47.73	100	1.6892	216.65	171.94	107.462	7.54717	115.01	5750.48	115	1.55
				C	0	22.22	20	5.57	47.79	100	1.6892	216.71	171.68	107.3	7.54717	114.847	0	0	0
				C	50	22.22	20	5.57	47.79	100	1.6892	216.71	171.68	107.3	7.54717	114.847	5742.35	115	1.55
				D	0	24.81	20	5.57	50.38	100	1.6892	219.3	176.48	110.3	7.54717	117.847	0	0	0
				D	50	24.81	20	5.57	50.38	100	1.6892	219.3	176.48	110.3	7.54717	117.847	5892.35	118	1.58
				E	0	22.71	20	5.57	48.28	100	1.6892	217.2	173.96	108.725	7.54717	116.272	0	0	0
				E	50	22.71	20	5.57	48.28	100	1.6892	217.2	173.96	108.725	7.54717	116.272	5813.6	116	1.56
			4 weeks	A	0	25.12	20	5.57	50.69	100	1.6892	219.61	174.49	109.056	7.54717	116.603	0	0	0
				A	50	25.12	20	5.57	50.69	100	1.6892	219.61	174.49	109.056	7.54717	116.603	5830.17	117	1.57
				B	0	23.06	20	5.57	48.63	100	1.6892	217.55	174.49	109.056	7.54717	116.603	0	0	0
				B	50	23.06	20	5.57	48.63	100	1.6892	217.55	174.49	109.056	7.54717	116.603	5830.17	117	1.57
				C	0	23.9	20	5.57	49.47	100	1.6892	218.39	174.49	109.056	7.54717	116.603	0	0	0
				C	50	23.9	20	5.57	49.47	100	1.6892	218.39	174.49	109.056	7.54717	116.603	5830.17	117	1.57
				D	0	23.96	20	5.57	49.53	100	1.6892	218.45	174.49	109.056	7.54717	116.603	0	0	0
				D	50	23.96	20	5.57	49.53	100	1.6892	218.45	174.49	109.056	7.54717	116.603	5830.17	117	1.57
				E	0	22.04	20	5.57	47.61	100	1.6892	216.53	174.49	109.056	7.54717	116.603	0	0	0
				E	50	22.04	20	5.57	47.61	100	1.6892	216.53	174.49	109.056	7.54717	116.603	5830.17	117	1.57
		Silty loam	field fresh	A	0	22.92	20	5.67	48.59	100	1.69069	217.659	174.739	109.212	7.54717	116.759	0	0	0
				A	50	22.92	20	5.67	48.59	100	1.69069	217.659	174.739	109.212	7.54717	116.759	5837.96	117	1.57
				B	0	23.7	20	5.67	49.37	100	1.69069	218.439	174.739	109.212	7.54717	116.759	0	0	0
				B	50	23.7	20	5.67	49.37	100	1.69069	218.439	174.739	109.212	7.54717	116.759	5837.96	117	1.57
				C	0	22.85	20	5.67	48.52	100	1.69069	217.589	174.739	109.212	7.54717	116.759	0	0	0
				C	50	22.85	20	5.67	48.52	100	1.69069	217.589	174.739	109.212	7.54717	116.759	5837.96	117	1.57
				D	0	22.26	20	5.67	47.93	100	1.69069	216.999	174.739	109.212	7.54717	116.759	0	0	0
				D	50	22.26	20	5.67	47.93	100	1.69069	216.999	174.739	109.212	7.54717	116.759	5837.96	117	1.57
				E	0	22.67	20	5.67	48.34	100	1.69069	217.409	174.739	109.212	7.54717	116.759	0	0	0
				E	50	22.67	20	5.67	48.34	100	1.69069	217.409	174.739	109.212	7.54717	116.759	5837.96	117	1.57
			0 weeks	A	0	23.68	20	5.67	49.35	100	1.69069	218.419	174.739	109.212	7.54717	116.759	0	0	0
				A	50	23.68	20	5.67	49.35	100	1.69069	218.419	174.739	109.212	7.54717	116.759	5837.96	117	1.57
				B	0	25.12	20	5.67	50.79	100	1.69069	219.859	174.739	109.212	7.54717	116.759	0	0	0
				B	50	25.12	20	5.67	50.79	100	1.69069	219.859	174.739	109.212	7.54717	116.759	5837.96	117	1.57
				C	0	23.67	20	5.67	49.34	100	1.69069	218.409	174.739	109.212	7.54717	116.759	0	0	0
				C	50	23.67	20	5.67	49.34	100	1.69069	218.409	174.739	109.212	7.54717	116.759	5837.96	117	1.57
				D	0	23.83	20	5.67	49.5	100	1.69069	218.569	174.739	109.212	7.54717	116.759	0	0	0
				D	50	23.83	20	5.67	49.5	100	1.69069	218.569	174.739	109.212	7.54717	116.759	5837.96	117	1.57
				E	0	24.21	20	5.67	49.88	100	1.69069	218.949	174.739	109.212	7.54717	116.759	0	0	0
				E	50	24.21	20	5.67	49.88	100	1.69069	218.949	174.739	109.212	7.54717	116.759	5837.96	117	1.57
			1 week	A	0	23.02	20	5.67	48.69	100	1.69069	217.759	174.739	109.212	7.54717	116.759	0	0	0
				A	50	23.02	20	5.67	48.69	100	1.69069	217.759	174.739	109.212	7.54717	116.759	5837.96	117	1.57
				B	0	22.9	20	5.67	48.57	100	1.69069	217.639	174.739	109.212	7.54717	116.759	0	0	0
				B	50	22.9	20	5.67	48.57	100	1.69069	217.639	174.739	109.212	7.54717	116.759	5837.96	117	1.57
				C	0	22.29	20	5.67	47.96	100	1.69069	217.029	174.739	109.212	7.54717	116.759	0	0	0
				C	50	22.29	20	5.67	47.96	100	1.69069	217.029	174.739	109.212	7.54717	116.759	5837.96	117	1.57
				D	0	22.53	20	5.67	48.2	100	1.69069	217.269	174.739	109.212	7.54717	116.759	0	0	0
				D	50	22.53	20	5.67	48.2	100	1.69069	217.269	174.739	109.212	7.54717	116.759	5837.96	117	1.57
				E	0	23.96	20	5.67	49.63	100	1.69069	218.699	174.739	109.212	7.54717	116.759	0	0	0
				E	50	23.96	20	5.67	49.63	100	1.69069	218.699	174.739	109.212	7.54717	116.759	5837.96	117	1.57
			4 weeks	A	0	22.73	20	5.67	48.4	100	1.69069	217.469	174.739	109.212	7.54717	116.759	0	0	0
				A	50	22.73	20	5.67	48.4	100	1.69069	217.469	174.739	109.212	7.54717	116.759	5837.96	117	1.57
				B	0	22.82	20	5.67	48.49	100	1.69069	217.559	174.739	109.212	7.54717	116.759	0	0	0
				B	50	22.82	20	5.67	48.49	100	1.69069	217.559	174.739	109.212	7.54717	116.759	5837.96	117	1.57
				C	0	24.77	20	5.67	50.44	100	1.69069	219.509	174.739	109.212	7.54717	116.759	0	0	0
				C	50	24.77	20	5.67	50.44	100	1.69069	219.509	174.739	109.212	7.54717	116.759	5837.96	117	1.57
				D	0	22.04	20	5.67	47.71	100	1.69069	216.779	174.739	109.212	7.54717	116.759	0	0	0
				D	50	22.04	20	5.67	47.71	100	1.69069	216.779	174.739	109.212	7.54717	116.759	5837.96	117	1.57
				E	0	23.2	20	5.67	48.87	100	1.69069	217.939	174.739	109.212	7.54717	116.759	0	0	0
				E	50	23.2	20	5.67	48.87	100	1.69069	217.939	174.739	109.212	7.54717	116.759	5837.96	117	1.57

## Sheet: SOC fractions
		basic data
		soil	treatm. (weeks)	sample	No.	q	initial dry weight	flask	flask, POM (oven-dry)	mass per flask	C	C:N	mv C:N	sd C:N	Corg	POM	mean value	standard deviation	C	mean value	standard deviation	Crel	mean value	standard deviation	T-Test (p<0.05)
						[J/ml]	[g]	[g]	[g]	[g]	[%]	(-)	(-)	(-)	[g]	(g/kg)	(g/kg)	(g/kg)	[g/kg]	[g/kg]	[g/kg]	[%]	[%]	[%]	f	0	1	4
		Clayey silt	field fresh	A	51	0	18.7202	5.3061	5.3188	0.0127	28.7258	21.4709	23.9447	4.08524	0.00364818	0.678412	1.18422	0.612771	0.194879	0.360424	0.217462	0.947088	1.81648	1.16123		0.221247	0.292396	0.503853
		Clayey silt	field fresh	B	52	0	19.1794	5.2437	5.2746	0.0309	33.38	23.2021			0.0103144	1.6111			0.537786			2.65548	-1.6155
		Clayey silt	field fresh	C	53	0	19.2459	5.2557	5.2648	0.0091	25.5376	18.9356			0.00232392	0.472828			0.120749			0.608618	5.21808
		Clayey silt	field fresh	D	54	0	19.2023	5.3044	5.328	0.0236	26.1371	27.2937			0.00616836	1.22902			0.32123			1.51136
		Clayey silt	field fresh	E	55	0	18.7072	5.2876	5.3237	0.0361	32.516	28.8211			0.0117383	1.92974			0.627474			3.35984
		Clayey silt	0	A	56	0	18.8584	5.2777	5.294	0.0163	48.73	28.98	30.08	5.66386	0.00794299	0.864336	1.50138	0.552617	0.421191	0.597913	0.257268	2.09722	2.80276	1.18959
		Clayey silt	0	B	57	0	18.9327	5.3664	5.4084	0.042	40.27	36.42			0.0169134	2.21838			0.893343			4.23318	-0.622652
		Clayey silt	0	C	58	0	18.9927	5.2892	5.3239	0.0347	46.81	35.47			0.0162431	1.82702			0.855227			3.91046	6.63033
		Clayey silt	0	D	59	0	18.8073	5.311	5.3399	0.0289	31.12	25.59			0.00899368	1.53664			0.478202			2.21082
		Clayey silt	0	E	60	0	19.2355	5.2292	5.2496	0.0204	32.21	23.94			0.00657084	1.06054			0.3416			1.56212
		Clayey silt	1	A	61	0	18.9819	5.3099	5.33	0.0201	31.58	25.59	25.564	4.80419	0.00634758	1.0589	1.66784	0.930992	0.334402	0.596205	0.346453	1.57847	2.81887	1.61456
		Clayey silt	1	B	62	0	19.0768	5.2745	5.3139	0.0394	41.23	28.66			0.0162446	2.06534			0.851538			3.98318	-2.02858
		Clayey silt	1	C	63	0	18.9259	5.253	5.3052	0.0522	33.48	31.51			0.0174766	2.75813			0.92342			4.25122	7.59023
		Clayey silt	1	D	64	0	18.8677	5.2906	5.2982	0.0076	32.11	22.8			0.00244036	0.402805			0.129341			0.630499
		Clayey silt	1	E	65	0	18.9871	5.3619	5.4009	0.039	36.14	19.26			0.0140946	2.05403			0.742325			3.65099
		Clayey silt	4	A	66	0	19.0326	5.311	5.3253	0.0143	53.8	71.58	34.238	21.77	0.0076934	0.751342	1.92765	1.48993	0.404222	0.502145	0.344177	2.0096	2.45586	1.68069
		Clayey silt	4	B	67	0	19.1585	5.3152	5.3373	0.0221	21.16	17.61			0.00467636	1.15353			0.244088			1.19543	1.12133
		Clayey silt	4	C	68	0	19.1694	5.2578	5.2869	0.0291	22.33	30.53			0.00649803	1.51804			0.338979			1.65747	2.55104
		Clayey silt	4	D	69	0	18.8389	5.316	5.401	0.085	24.5	19.97			0.020825	4.51194			1.10543			5.40189
		Clayey silt	4	E	70	0	19.3145	5.2461	5.279	0.0329	24.54	31.5			0.00807366	1.70338			0.41801			2.0149
		Clayey silt	field fresh	A	51	50	18.7202	5.2909	5.3217	0.0308	44.2212	23.4272	23.3432	2.70393	0.0136201	1.64528	1.8837	1.17204	0.727563	0.857095	0.567583	3.53587	4.21245	2.61496		0.00208544	0.0100159	0.0932036
		Clayey silt	field fresh	B	52	50	19.1794	5.2638	5.2836	0.0198	45.0575	26.8436			0.00892139	1.03236			0.465155			2.29684	-0.784319
		Clayey silt	field fresh	C	53	50	19.2459	5.2704	5.2908	0.0204	42.3317	23.6067			0.00863567	1.05997			0.448702			2.26162	7.43211
		Clayey silt	field fresh	D	54	50	19.2023	5.3095	5.3842	0.0747	47.08	23.6			0.0351688	3.89016			1.83149			8.61697
		Clayey silt	field fresh	E	55	50	18.7072	5.2682	5.3017	0.0335	45.3758	19.2384			0.0152009	1.79075			0.812569			4.35095
		Clayey silt	0	A	56	50	18.8584	5.2909	5.379	0.0881	41.97	17.71	19.152	1.08872	0.0369756	4.67166	5.10026	0.716961	1.96069	2.13649	0.307526	9.76279	10.0131	1.25889
		Clayey silt	0	B	57	50	18.9327	5.382	5.4698	0.0878	41.75	18.49			0.0366565	4.63748			1.93615			9.1746	8.21107
		Clayey silt	0	C	58	50	18.9927	5.2665	5.3868	0.1203	42.09	20.51			0.0506343	6.33401			2.66599			12.19	10.7805
		Clayey silt	0	D	59	50	18.8073	5.2756	5.3646	0.089	41.69	19.75			0.0371041	4.73221			1.97286			9.1209
		Clayey silt	0	E	60	50	19.2355	5.3282	5.4268	0.0986	41.88	19.3			0.0412937	5.12594			2.14674			9.81696
		Clayey silt	1	A	61	50	18.9819	5.3092	5.3708	0.0616	41.14	18.59	19.326	0.580844	0.0253422	3.2452	4.46557	0.837569	1.33507	1.86431	0.353426	6.30194	8.86829	1.67181
		Clayey silt	1	B	62	50	19.0768	5.26	5.3489	0.0889	41.9	19.2			0.0372491	4.66011			1.95259			9.13347	6.07117
		Clayey silt	1	C	63	50	18.9259	5.2544	5.3517	0.0973	41.75	19.02			0.0406227	5.1411			2.14641			9.88158	12.1678
		Clayey silt	1	D	64	50	18.8677	5.3453	5.4445	0.0992	41.62	19.82			0.041287	5.25766			2.18824			10.6671
		Clayey silt	1	E	65	50	18.9871	5.2751	5.3515	0.0764	42.23	20			0.0322637	4.02378			1.69924			8.35742
		Clayey silt	4	A	66	50	19.0326	5.3265	5.3783	0.0518	43.17	20.52	20.79	0.586089	0.0223621	2.72165	3.59277	1.39225	1.17493	1.53803	0.59873	5.84121	7.50723	2.84849
		Clayey silt	4	B	67	50	19.1585	5.2777	5.3544	0.0767	41.72	20.26			0.0319992	4.00344			1.67024			8.18006	2.33295
		Clayey silt	4	C	68	50	19.1694	5.2772	5.3161	0.0389	43.42	21.78			0.0168904	2.02928			0.881112			4.30827	11.6883
		Clayey silt	4	D	69	50	18.8389	5.3099	5.3763	0.0664	42.64	20.8			0.028313	3.52462			1.5029			7.34423
		Clayey silt	4	E	70	50	19.3145	5.2833	5.3931	0.1098	43.29	20.59			0.0475324	5.68485			2.46097			11.8624
		Clayey silt	field fresh	A	51	residuum	18.7202	25.4127	44.0894	18.6767	1.97	9.79	10.24	1.16437	0.367931				19.6542	18.9022	0.953759	95.517	93.9711	2.87924		0.00256364	0.00959138	0.07991
		Clayey silt	field fresh	B	52	residuum	19.1794	25.3757	44.5044	19.1287	1.93	9.76			0.369184				19.249			95.0477	87.4474
		Clayey silt	field fresh	C	53	residuum	19.2459	25.4704	44.6868	19.2164	1.93	9.7			0.370877				19.2704			97.1298	100.359
		Clayey silt	field fresh	D	54	residuum	19.2023	25.6205	44.7245	19.104	1.92	9.63			0.366797				19.1017			89.8717
		Clayey silt	field fresh	E	55	residuum	18.7072	26.3635	45.0011	18.6376	1.73	12.32			0.32243				17.2356			92.2892
		Clayey silt	0	A	56	residuum	18.8584	24.561	43.315	18.754	1.78	9.29	9.418	0.314356	0.333821				17.7015	18.5765	0.692215	88.14	87.1842	2.01989
		Clayey silt	0	B	57	residuum	18.9327	26.5347	45.3376	18.8029	1.84	9.26			0.345973				18.2739			86.5922	83.5492
		Clayey silt	0	C	58	residuum	18.9927	25.0103	43.848	18.8377	1.85	9.28			0.348497				18.349			83.8995	91.664
		Clayey silt	0	D	59	residuum	18.8073	25.3727	44.0621	18.6894	1.93	9.28			0.360705				19.179			88.6683
		Clayey silt	0	E	60	residuum	19.2355	25.2511	44.3676	19.1165	1.95	9.98			0.372772				19.3794			88.6209
		Clayey silt	1	A	61	residuum	18.9819	25.584	44.4842	18.9002	1.96	9.61	9.514	0.0789303	0.370444				19.5156	18.5657	0.612771	92.1196	88.3128	2.38594
		Clayey silt	1	B	62	residuum	19.0768	25.2076	44.1561	18.9485	1.87	9.52			0.354337				18.5742			86.8834	84.1547
		Clayey silt	1	C	63	residuum	18.9259	23.5395	42.3159	18.7764	1.88	9.57			0.352996				18.6515			85.8672	91.4311
		Clayey silt	1	D	64	residuum	18.8677	25.4117	44.1726	18.7609	1.83	9.44			0.343324				18.1964			88.7024
		Clayey silt	1	E	65	residuum	18.9871	25.3313	44.203	18.8717	1.8	9.43			0.339691				17.8906			87.9916
		Clayey silt	4	A	66	residuum	19.0326	26.5778	45.5443	18.9665	1.86	9.47	9.302	0.480385	0.352777				18.5354	18.3987	0.570381	92.1492	90.0369	3.31104
		Clayey silt	4	B	67	residuum	19.1585	26.5777	45.6374	19.0597	1.86	9.46			0.35451				18.5041			90.6245	79.9109
		Clayey silt	4	C	68	residuum	19.1694	24.6571	43.7585	19.1014	1.93	9.76			0.368657				19.2315			94.0343	99.4921
		Clayey silt	4	D	69	residuum	18.8389	25.2742	43.9617	18.6875	1.8	9.33			0.336375				17.8553			87.2539
		Clayey silt	4	E	70	residuum	19.3145	25.3513	44.5231	19.1718	1.8	8.49			0.345092				17.867			86.1227
		Loamy sand	field fresh	A	-	0	20.2892	8.8988	9.0117	0.1129	21.78	18.77	20.076	1.53586	0.0245896	5.56454	3.71202	1.39884	1.21196	1.16375	0.350951	3.45677	3.3812	0.981342		0.00523545	0.125522	0.188977
		Loamy sand	field fresh	B	-	0	19.8799	8.2369	8.298	0.0611	34.18	21.09			0.020884	3.07346			1.05051			3.20908	2.83756
		Loamy sand	field fresh	C	-	0	20.1166	8.9095	8.9914	0.0819	41.26	22.28			0.0337919	4.07126			1.6798			4.83471	3.82829
		Loamy sand	field fresh	D	-	0	20.1957	8.9698	9.052	0.0822	28.8	19.21			0.0236736	4.07017			1.17221			3.3286
		Loamy sand	field fresh	E	-	0	19.9925	8.9904	9.026	0.0356	39.55	19.03			0.0140798	1.78067			0.704254			2.07685
		Loamy sand	0	A	-	0	19.7492	5.2664	5.4528	0.1864	37.2	19.55	19.152	0.772477	0.0693408	9.43836	7.85741	3.58312	3.51107	2.2577	0.701387	9.74927	6.72478	1.70519
		Loamy sand	0	B	-	0	19.8986	5.3108	5.4199	0.1091	35.88	20.03			0.0391451	5.4828			1.96723			6.20157	5.1373
		Loamy sand	0	C	-	0	20.0658	5.2542	5.5246	0.2704	14.65	18.62			0.0396136	13.4757			1.97418			6.17662	6.84013
		Loamy sand	0	D	-	0	19.7892	5.3619	5.4713	0.1094	34.23	18.11			0.0374476	5.52827			1.89233			5.72058
		Loamy sand	0	E	-	0	20.1232	5.2878	5.3957	0.1079	36.25	19.45			0.0391138	5.36197			1.94371			5.77586
		Loamy sand	1	A	-	0	20.0965	5.3028	5.4635	0.1607	31.45	20.44	20.148	1.30183	0.0505401	7.99642	4.67513	1.91889	2.51487	1.56718	0.556713	7.15927	4.72736	1.46063
		Loamy sand	1	B	-	0	20.3992	5.2669	5.3289	0.062	34.21	20.69			0.0212102	3.03933			1.03976			3.22025	3.74762
		Loamy sand	1	C	-	0	20.3589	5.3288	5.4151	0.0863	34.24	21.87			0.0295491	4.23893			1.45141			4.52491	4.99129
		Loamy sand	1	D	-	0	20.6658	5.3107	5.3911	0.0804	35.27	18.58			0.0283571	3.89049			1.37217			4.21399
		Loamy sand	1	E	-	0	20.2589	5.2429	5.3282	0.0853	34.62	19.16			0.0295309	4.2105			1.45767			4.51838
		Loamy sand	4	A	-	0	20.3551	5.2704	5.3299	0.0595	32.97	21.51	23.252	2.48425	0.0196171	2.9231	4.21633	0.778545	0.963746	1.38349	0.245607	2.96556	4.16714	0.731484
		Loamy sand	4	B	-	0	20.3881	5.293	5.3796	0.0866	35.71	27.56			0.0309249	4.24758			1.51681			4.62113	2.96437
		Loamy sand	4	C	-	0	20.3455	5.3324	5.4193	0.0869	31.95	23.07			0.0277645	4.27121			1.36465			3.96615	5.63579
		Loamy sand	4	D	-	0	20.2075	5.2715	5.3669	0.0954	32.83	22.39			0.0313198	4.72102			1.54991			4.63401
		Loamy sand	4	E	-	0	20.2694	5.2472	5.3469	0.0997	30.95	21.73			0.0308571	4.91874			1.52235			4.64882
		Loamy sand	field fresh	A	-	50	20.2892	9.0439	9.1794	0.1355	39.46	17.97	15.566	1.39525	0.0534683	6.67843	6.70673	0.724787	2.63531	2.37434	0.306935	7.51648	6.91638	0.876408		0.0555555	0.271572	0.813055
		Loamy sand	field fresh	B	-	50	19.8799	9.0683	9.1944	0.1261	34.14	15.59			0.0430505	6.34309			2.16553			6.61525	5.2634
		Loamy sand	field fresh	C	-	50	20.1166	8.8507	8.9689	0.1182	33.65	14.61			0.0397743	5.87574			1.97719			5.69062	8.86833
		Loamy sand	field fresh	D	-	50	20.1957	9.0048	9.1422	0.1374	35.16	14.76			0.0483098	6.80343			2.39209			6.79254
		Loamy sand	field fresh	E	-	50	19.9925	8.9104	9.067	0.1566	34.49	14.9			0.0540113	7.83294			2.70158			7.96697
		Loamy sand	0	A	-	50	19.7492	5.3117	5.4405	0.1288	38.17	15.56	15.866	0.388626	0.049163	6.52178	6.90045	0.30402	2.48936	2.69209	0.156666	6.91228	8.11999	0.823075
		Loamy sand	0	B	-	50	19.8986	5.26	5.3988	0.1388	40.06	16.33			0.0556033	6.97537			2.79433			8.80896	6.06983
		Loamy sand	0	C	-	50	20.0658	5.2908	5.4361	0.1453	38.17	15.49			0.055461	7.24118			2.76396			8.64758	10.1942
		Loamy sand	0	D	-	50	19.7892	5.2751	5.4158	0.1407	40.08	16.23			0.0563926	7.10994			2.84966			8.61465
		Loamy sand	0	E	-	50	20.1232	5.2716	5.4055	0.1339	38.52	15.72			0.0515783	6.65401			2.56313			7.61648
		Loamy sand	1	A	-	50	20.0965	5.2612	5.4152	0.154	38.94	16.75	15.27	0.943901	0.0599676	7.66303	6.65196	0.674303	2.98398	2.46701	0.307785	8.49472	7.48886	0.638005
		Loamy sand	1	B	-	50	20.3992	5.327	5.4508	0.1238	36.5	15.43			0.045187	6.06887			2.21514			6.86055	6.30531
		Loamy sand	1	C	-	50	20.3589	5.3028	5.4308	0.128	36.99	14.72			0.0473472	6.28718			2.32563			7.25037	8.53333
		Loamy sand	1	D	-	50	20.6658	5.314	5.4591	0.1451	35.7	14.25			0.0518007	7.02126			2.50659			7.69782
		Loamy sand	1	E	-	50	20.2589	5.2554	5.3814	0.126	37.04	15.2			0.0466704	6.21949			2.3037			7.14082
		Loamy sand	4	A	-	50	20.3551	5.3106	5.4701	0.1595	35.06	15.78	16.192	1.10439	0.0559207	7.83587	6.47588	0.850494	2.74726	2.33933	0.285518	8.45364	7.05332	0.895234
		Loamy sand	4	B	-	50	20.3881	5.28	5.4143	0.1343	35.28	15.83			0.047381	6.58718			2.32396			7.0802	4.99548
		Loamy sand	4	C	-	50	20.3455	5.1652	5.2962	0.131	38.42	17.75			0.0503302	6.43877			2.47378			7.18964	8.50614
		Loamy sand	4	D	-	50	20.2075	5.2799	5.3957	0.1158	36.84	16.76			0.0426607	5.73055			2.11113			6.31198
		Loamy sand	4	E	-	50	20.2694	5.3082	5.4255	0.1173	35.26	14.84			0.04136	5.78705			2.04051			6.23114
		Loamy sand	field fresh	A	-	residuum	20.2892	25.0112	45.052	20.0408	3.16	10.4	10.2	0.122474	0.633289				31.2131	30.7952	0.822638	89.0267	89.7024	0.454942		4.52475e-05	0.0764347	0.00670361
		Loamy sand	field fresh	B	-	residuum	19.8799	24.8487	44.5414	19.6927	2.98	10.2			0.586842				29.5194			90.1757	88.7524
		Loamy sand	field fresh	C	-	residuum	20.1166	22.2737	42.1902	19.9165	3.14	10.1			0.625378				31.0877			89.4747	90.6784
		Loamy sand	field fresh	D	-	residuum	20.1957	24.5845	44.5606	19.9761	3.2	10.2			0.639235				31.652			89.8789
		Loamy sand	field fresh	E	-	residuum	19.9925	25.4507	45.251	19.8003	3.08	10.1			0.609849				30.5039			89.9562
		Loamy sand	0	A	-	residuum	19.7492	25.3859	44.8199	19.434	3.05	10.2	10.04	0.151658	0.592737				30.0132	28.336	1.28437	83.3384	85.1552	1.1935
		Loamy sand	0	B	-	residuum	19.8986	21.2065	40.8572	19.6507	2.73	10.2			0.536464				26.9599			84.9895	83.9765
		Loamy sand	0	C	-	residuum	20.0658	25.1821	44.8322	19.6501	2.78	9.9			0.546273				27.2241			85.1758	86.6777
		Loamy sand	0	D	-	residuum	19.7892	24.5772	44.1163	19.5391	2.87	9.9			0.560772				28.3373			85.6648
		Loamy sand	0	E	-	residuum	20.1232	24.8529	44.7343	19.8814	2.95	10			0.586501				29.1455			86.6077
		Loamy sand	1	A	-	residuum	20.0965	24.4625	44.2443	19.7818	3.01	10.2	10.14	0.0547723	0.595432				29.6287	28.8288	0.522424	84.346	87.7838	2.06007
		Loamy sand	1	B	-	residuum	20.3992	25.2196	45.433	20.2134	2.93	10.1			0.592253				29.0331			89.9192	87.7092
		Loamy sand	1	C	-	residuum	20.3589	24.5614	44.706	20.1446	2.86	10.1			0.576136				28.299			88.2247	88.7197
		Loamy sand	1	D	-	residuum	20.6658	24.5614	45.0017	20.4403	2.9	10.2			0.592769				28.6836			88.0882
		Loamy sand	1	E	-	residuum	20.2589	25.0423	45.0899	20.0476	2.88	10.1			0.577371				28.4996			88.3408
		Loamy sand	4	A	-	residuum	20.3551	24.973	45.1091	20.1361	2.91	10.1	10.16	0.0547723	0.585961				28.7869	29.4616	0.723357	88.5808	88.7795	0.341394
		Loamy sand	4	B	-	residuum	20.3881	24.8483	45.0155	20.1672	2.93	10.1			0.590899				28.9825			88.2987	87.871
		Loamy sand	4	C	-	residuum	20.3455	24.6861	44.8137	20.1276	3.09	10.2			0.621943				30.5691			88.8442	89.7638
		Loamy sand	4	D	-	residuum	20.2075	25.396	45.3923	19.9963	3.01	10.2			0.601889				29.7854			89.054
		Loamy sand	4	E	-	residuum	20.2694	25.4262	45.4786	20.0524	2.95	10.2			0.591546				29.1842			89.12
		Silty loam	field fresh	A	-	0	20.1646	8.9938	8.9983	0.0045	22.21	19.6	15.884	8.22049	0.00099945	0.223163	0.195531	0.0781497	0.0495646	0.0524628	0.0354249	0.244682	0.256975	0.175107		0.00206435	0.0401492	0.0344583
		Silty loam	field fresh	B	-	0	19.9709	8.7589	8.7649	0.006	36.79	26.85			0.0022074	0.300437			0.110531			0.544655	0.129667
		Silty loam	field fresh	C	-	0	20.0509	8.8666	8.8694	0.0028	29.2	9.9			0.0008176	0.139645			0.0407762			0.198676	0.313691
		Silty loam	field fresh	D	-	0	20.0479	9.0277	9.0297	0.002	14.06	5.94			0.0002812	0.0997611			0.0140264			0.0685036
		Silty loam	field fresh	E	-	0	20.0328	9.0401	9.0444	0.0043	22.09	17.13			0.00094987	0.214648			0.0474157			0.228357
		Silty loam	0	A	-	0	18.5471	5.3091	5.3366	0.0275	36.42	31.69	23.122	5.81906	0.0100155	1.48271	1.07028	0.348541	0.540004	0.353212	0.135824	2.83785	1.78617	0.743445
		Silty loam	0	B	-	0	19.7731	5.3153	5.3315	0.0162	33.97	24.26			0.00550314	0.819295			0.278314			1.33072	0.363401
		Silty loam	0	C	-	0	19.9552	5.3162	5.343	0.0268	29.31	23.72			0.00785508	1.34301			0.393636			1.9191	2.94292
		Silty loam	0	D	-	0	20.6926	5.2599	5.2818	0.0219	35.64	16.06			0.00780516	1.05835			0.377196			1.9756
		Silty loam	0	E	-	0	20.3699	5.3658	5.379	0.0132	27.3	19.88			0.0036036	0.648015			0.176908			0.867573
		Silty loam	1	A	-	0	19.9399	5.3101	5.3782	0.0681	30.68	28.63	18.788	7.00858	0.0208931	3.41526	1.42743	1.14888	1.0478	0.431754	0.359028	4.74322	2.01987	1.60165
		Silty loam	1	B	-	0	19.8252	5.3454	5.3683	0.0229	27.48	15.05			0.00629292	1.1551			0.31742			1.50883	-0.690825
		Silty loam	1	C	-	0	19.9435	5.2939	5.319	0.0251	33.73	23.74			0.00846623	1.25856			0.424511			2.07357	3.73221
		Silty loam	1	D	-	0	19.8512	5.2874	5.3028	0.0154	21.35	13.3			0.0032879	0.775772			0.165627			0.805914
		Silty loam	1	E	-	0	19.9065	5.3219	5.3325	0.0106	38.2	13.22			0.0040492	0.532489			0.203411			0.967812
		Silty loam	4	A	-	0	19.8704	5.2718	5.2779	0.0061	29.62	16.58	16.344	2.84631	0.00180682	0.306989	0.668224	0.413868	0.0909302	0.180866	0.10648	0.457713	0.885412	0.523722
		Silty loam	4	B	-	0	19.7438	5.3265	5.3372	0.0107	23.58	18.53			0.00252306	0.541942			0.12779			0.618788	-0.507486
		Silty loam	4	C	-	0	20.0086	5.3099	5.3316	0.0217	22.34	14.73			0.00484778	1.08453			0.242285			1.17873	2.19046
		Silty loam	4	D	-	0	19.7927	5.327	5.3325	0.0055	37.69	12.43			0.00207295	0.27788			0.104733			0.504243
		Silty loam	4	E	-	0	19.9155	5.3011	5.3236	0.0225	29.97	19.45			0.00674325	1.12977			0.338593			1.66759
		Silty loam	field fresh	A	-	50	20.1646	8.888	8.9071	0.0191	34.89	14.47	14.93	1.04547	0.00666399	0.947205	1.07512	0.451608	0.33048	0.415729	0.206609	1.63145	2.02442	0.983782		9.57459e-08	2.78277e-08	9.19981e-06
		Silty loam	field fresh	B	-	50	19.9709	8.9289	8.943	0.0141	28.8	15.16			0.0040608	0.706027			0.203336			1.00196	1.12554
		Silty loam	field fresh	C	-	50	20.0509	9.0802	9.0982	0.018	45.01	16.44			0.0081018	0.897715			0.404062			1.96873	2.47464
		Silty loam	field fresh	D	-	50	20.0479	8.9453	8.9646	0.0193	39.76	15			0.00767368	0.962694			0.382767			1.8694
		Silty loam	field fresh	E	-	50	20.0328	8.9122	8.9495	0.0373	40.71	13.58			0.0151848	1.86195			0.757998			3.65056
		Silty loam	0	A	-	50	18.5471	5.3257	5.4458	0.1201	41.93	14.45	14.176	0.213495	0.0503579	6.47541	8.36125	1.11999	2.71514	3.36953	0.410438	14.2687	16.8248	1.56108
		Silty loam	0	B	-	50	19.7731	5.2582	5.433	0.1748	40.75	14.31			0.071231	8.84029			3.60242			17.2244	16.5796
		Silty loam	0	C	-	50	19.9552	5.3367	5.5026	0.1659	41.86	14.19			0.0694457	8.31362			3.48008			16.9665	17.6113
		Silty loam	0	D	-	50	20.6926	5.2779	5.4599	0.182	37.17	13.96			0.0676494	8.79541			3.26926			17.123
		Silty loam	0	E	-	50	20.3699	5.3822	5.5733	0.1911	40.3	13.97			0.0770133	9.38149			3.78074			18.5411
		Silty loam	1	A	-	50	19.9399	5.2748	5.4325	0.1577	38.55	13.62	13.436	0.274099	0.0607934	7.90877	8.48767	0.418474	3.04883	3.27592	0.167761	13.8015	15.594	1.05888
		Silty loam	1	B	-	50	19.8252	5.2502	5.4241	0.1739	38.69	13.45			0.0672819	8.77166			3.39376			16.132	15.0301
		Silty loam	1	C	-	50	19.9435	5.2572	5.425	0.1678	38.18	12.96			0.064066	8.41377			3.21238			15.6912	16.7931
		Silty loam	1	D	-	50	19.8512	5.317	5.4827	0.1657	38.86	13.55			0.064391	8.3471			3.24368			15.7832
		Silty loam	1	E	-	50	19.9065	5.2751	5.4542	0.1791	38.69	13.6			0.0692938	8.99706			3.48096			16.5621
		Silty loam	4	A	-	50	19.8704	5.271	5.4066	0.1356	38.08	14.21	14.082	0.311159	0.0516365	6.82422	6.67267	1.26357	2.59866	2.55893	0.441113	13.0808	12.5313	2.16156
		Silty loam	4	B	-	50	19.7438	5.2778	5.4457	0.1679	37.42	14.12			0.0628282	8.50394			3.18217			15.4088	9.86975
		Silty loam	4	C	-	50	20.0086	5.339	5.4758	0.1368	38.81	13.9			0.0530921	6.83706			2.65346			12.9092	15.0075
		Silty loam	4	D	-	50	19.7927	5.2728	5.3721	0.0993	39.17	14.5			0.0388958	5.017			1.96516			9.46137
		Silty loam	4	E	-	50	19.9155	5.2911	5.4142	0.1231	38.75	13.68			0.0477013	6.18112			2.39518			11.7964
		Silty loam	field fresh	A	-	residuum	20.1646	25.1025	45.2435	20.141	1.99	9.7	9.62	0.109545	0.400806				19.8767	19.9946	0.0860707	98.1239	97.7186	0.920217		2.54029e-09	1.79639e-09	5.9771e-06
		Silty loam	field fresh	B	-	residuum	19.9709	25.3044	45.2552	19.9508	2	9.5			0.399016				19.9799			98.4534	97.3957
		Silty loam	field fresh	C	-	residuum	20.0509	24.8776	44.9077	20.0301	2.01	9.7			0.402605				20.0791			97.8326	98.5608
		Silty loam	field fresh	D	-	residuum	20.0479	25.0831	45.1097	20.0266	2.01	9.7			0.402535				20.0786			98.0621
		Silty loam	field fresh	E	-	residuum	20.0328	24.7542	44.7454	19.9912	2	9.5			0.399824				19.9585			96.1211
		Silty loam	0	A	-	residuum	18.5471	25.0684	43.4679	18.3995	1.59	9.4	9	0.223607	0.292552				15.7735	16.265	0.646219	82.8934	81.3891	0.896644
		Silty loam	0	B	-	residuum	19.7731	25.288	44.8701	19.5821	1.72	8.9			0.336812				17.0339			81.4448	80.0861
		Silty loam	0	C	-	residuum	19.9552	25.5618	45.3243	19.7625	1.68	8.9			0.33201				16.6378			81.1144	82.2601
		Silty loam	0	D	-	residuum	20.6926	25.7161	46.2048	20.4887	1.56	8.9			0.319624				15.4463			80.9014
		Silty loam	0	E	-	residuum	20.3699	24.6371	44.8027	20.1656	1.66	8.9			0.334749				16.4335			80.5914
		Silty loam	1	A	-	residuum	19.9399	24.5506	44.2647	19.7141	1.82	9.1	9.18	0.083666	0.358797				17.9939	17.3262	0.424399	81.4553	82.3861	0.697705
		Silty loam	1	B	-	residuum	19.8252	25.1651	44.7935	19.6284	1.75	9.2			0.343497				17.3263			82.3592	81.883
		Silty loam	1	C	-	residuum	19.9435	25.5212	45.2718	19.7506	1.7	9.3			0.33576				16.8356			82.2352	82.8223
		Silty loam	1	D	-	residuum	19.8512	24.6626	44.3327	19.6701	1.73	9.2			0.340293				17.1422			83.4109
		Silty loam	1	E	-	residuum	19.9065	25.292	45.0088	19.7168	1.75	9.1			0.345044				17.3332			82.4701
		Silty loam	4	A	-	residuum	19.8704	25.4321	45.1608	19.7287	1.73	9.3	9.38	0.130384	0.341307				17.1766	17.6897	0.59605	86.4615	86.5833	2.19057
		Silty loam	4	B	-	residuum	19.7438	25.3672	44.9324	19.5652	1.75	9.2			0.342391				17.3417			83.9724	84.976
		Silty loam	4	C	-	residuum	20.0086	24.2827	44.1328	19.8501	1.78	9.4			0.353332				17.659			85.912	87.472
		Silty loam	4	D	-	residuum	19.7927	25.2346	44.9225	19.6879	1.88	9.5			0.370133				18.7005			90.0344
		Silty loam	4	E	-	residuum	19.9155	25.5518	45.3217	19.7699	1.77	9.5			0.349927				17.5706			86.536
			1.5xIQR test
			Shapiro-Wilk test
			Outliers

## Sheet: Water stable aggregates
		Oven-dried				water labile (<250µm)			water stable (<250µm)			>250µm
		treatment	Inc	no	sample	empty flask	flask+ soil (oven-dry)	m1	empty flask	flask+ soil (oven-dry)	m2	empty flask	flask+ soil (oven-dry)	mR	WLA (m1/(m1+m2+R))	mean value	standard deviation	T-Test (p<0.05)			WSA (m2/(m1+m2+R))	mean value	standard deviation	T-Test (p<0.05)			R (R/(m1+m2+R))	mean value	standard deviation	T-Test (p<0.05)
						(g)	(g)	(g)	(g)	(g)	(g)	(g)	(g)	(g)	(mass%)	(%)	(%)	0W	1W	4W	(mass%)	(%)	(%)	0W	1W	4W	(mass%)	(%)	(%)	0W	1W	4W
		Loamy sand	field fresh	1	A	58.5818	59.9365	1.3547	50.749	51.526	0.777	24.5206	24.9211	0.4005	53.4989	34.033	12.7439	0.315039	0.541166	0.401686	30.6848	51.7787	14.0716	0.402394	0.687004	0.565081	15.8163	14.1883	1.63539	0.677941	0.251712	0.408854
				2	B	41.7488	42.4441	0.6953	71.7366	74.3566	2.62	28.1596	28.6229	0.4633	18.401	21.6076					69.3378	36.1598					12.2612	8.5257
				3a	C	39.6602	40.7022	1.042	63.2286	65.1669	1.9383	25.1342	25.5643	0.4301	30.5536	45.4636					56.835	69.2401					12.6114	19.421
				4a	D	99.31	100.335	1.0254	42.4717	44.2294	1.7577	19.3771	19.8812	0.5041	31.1937	0.9697					53.471	1					15.3352	0.5103
				5a	E	55.4345	56.6979	1.2634	56.0809	57.7611	1.6802	27.3933	27.9094	0.5161	36.5176						48.5649						14.9175
			0 weeks	1	A	58.5808	59.2579	0.6771	58.8849	61.2994	2.4145	29.3937	30.1317	0.738	17.6807	27.3576	5.61358				63.0484	57.6574	4.79865				19.2709	14.9849	3.79699
				2a	B	41.748	42.8842	1.1362	57.7776	59.9393	2.1617	34.3066	34.7794	0.4728	30.1323	24.3277					57.3289	49.7804					12.5388	5.04981
				3a	C	70.1174	71.1836	1.0662	52.7392	54.962	2.2228	23.9049	24.2646	0.3597	29.2214	33.6151					60.9203	67.6043					9.85831	25.0204
				4	D	70.7257	71.9299	1.2042	57.2819	59.1866	1.9047	26.8991	27.56	0.6609	31.9433	0.8621					50.5252	0.8301					17.5314	0.9983
				5a	E	50.7494	51.7419	0.9925	58.6302	60.6453	2.0151	28.8297	29.3909	0.5612	27.8105						56.4644						15.7252
			1 week	1a	A	63.2286	64.1899	0.9613	70.5997	72.5546	1.9549	24.5208	25.0164	0.4956	28.1757	38.4194	8.58971				57.2982	48.7017	8.5464				14.5261	12.8788	1.71546
				2	B	42.469	43.6502	1.1812	41.6181	43.8123	2.1942	25.1345	25.5555	0.421	31.1137	12.5337					57.7969	18.1085					11.0895	7.42866
				3a	C	55.4348	57.2595	1.8247	42.247	43.729	1.482	27.2209	27.6585	0.4376	48.7327	62.0804					39.5802	80.812					11.6871	18.7845
				4a	D	98.3466	99.9726	1.626	35.1507	36.7065	1.5558	26.3829	26.939	0.5561	43.5004	0.8559					41.6223	0.637					14.8773	0.709
				5	E	56.0812	57.499	1.4178	56.5175	58.1672	1.6497	27.0493	27.4761	0.4268	40.5747						47.2112						12.2142
			4 weeks	1a	A	58.8813	60.8774	1.9961	70.6125	72.0267	1.4142	29.3926	30.1559	0.7633	47.8268	40.5442	10.3874				33.8844	46.8818	11.6185				18.2888	12.574	3.80527
				2a	B	56.6328	57.7574	1.1246	41.6141	44.0125	2.3984	27.8394	28.3921	0.5527	27.5928	16.7007					58.8463	4.16889					13.5609	5.99041
				3	C	56.3457	58.0061	1.6604	40.9675	43.1305	2.163	33.0117	33.5527	0.541	38.0442	66.5025					49.5601	87.9494					12.3957	18.1031
				4a	D	57.2782	58.5128	1.2346	63.9599	65.9328	1.9729	26.8976	27.18	0.2824	35.3764	0.6513					56.5317	0.2509					8.09192	0.9991
				5	E	57.2249	59.2742	2.0493	56.5122	57.8657	1.3535	23.6601	24.0607	0.4006	53.8807						35.5866						10.5327
		Clayey silt	field fresh	1	A	57.2661	57.9528	0.6867	55.7725	58.8797	3.1072	56.1622	56.388	0.2258	17.0834	16.7558	2.49663	0.0513379	0.250187	0.445695	77.2993	78.9147	2.78568	0.0340002	0.162364	0.38231	5.61733	4.32942	0.752233	0.0624848	0.0484501	0.523093
				2a	B	59.0633	59.6197	0.5564	59.9583	63.2176	3.2593	61.1106	61.2725	0.1619	13.9883	8.85627					81.9414	70.5624					4.07029	3.5021
				3a	C	60.032	60.6106	0.5786	68.8998	72.1585	3.2587	53.9338	54.0807	0.1469	14.5224	23.9658					81.7906	88.5275					3.68706	4.7703
				4	D	52.3972	53.1448	0.7476	57.3784	60.5536	3.1752	58.5375	58.7	0.1625	18.2998	0.324					77.7226	0.8714					3.97768	0.6306
				5a	E	61.9552	62.7465	0.7913	57.5084	60.5255	3.0171	62.058	62.2289	0.1709	19.8854						75.8199						4.29473
			0 weeks	1a	A	52.154	52.8286	0.6746	56.0797	59.2509	3.1712	71.7374	71.8819	0.1445	16.906	11.6733	4.29139				79.4727	84.7509	4.28519				3.62128	3.5758	0.202584
				2	B	53.3283	53.8957	0.5674	56.3501	59.7038	3.3537	55.4336	55.5704	0.1368	13.9826	4.56417					82.6462	77.7911					3.3712	3.29356
				3a	C	60.9458	61.422	0.4762	58.8839	62.2961	3.4122	57.2283	57.3691	0.1408	11.8187	19.6337					84.6868	90.7381					3.49449	3.81791
				4	D	65.2029	65.6087	0.4058	56.6356	60.0473	3.4117	57.7833	57.9383	0.155	10.2152	0.9959					85.8829	0.9915					3.90183	0.09743
				5a	E	99.3103	99.5293	0.219	70.117	73.7803	3.6633	52.7445	52.8849	0.1404	5.4441						91.0657						3.49019
			1 week	1a	A	57.2661	57.8728	0.6067	55.7725	59.0694	3.2969	56.1622	56.3165	0.1543	14.9511	13.8225	4.66433				81.2465	82.6901	4.72526				3.80246	3.4874	0.298796
				2a	B	61.9208	62.2889	0.3681	55.2051	58.6859	3.4808	54.579	54.7089	0.1299	9.25153	1.58718					87.4837	73.0476					3.2648	2.63883
				3	C	54.3075	54.6915	0.384	55.945	59.4115	3.4665	53.5479	53.6951	0.1472	9.60552	22.9694					86.7124	94.9112					3.68212	4.30809
				4a	D	52.3972	53.212	0.8148	57.3784	60.371	2.9926	58.5375	58.6796	0.1421	20.6305	0.5745					75.7716	0.6532					3.59792	0.4648
				5	E	68.3218	68.9036	0.5818	57.6848	60.9453	3.2605	54.126	54.2485	0.1225	14.6741						82.2362						3.08969
			4 weeks	1	A	57.2661	58.1262	0.8601	55.7725	58.6224	2.8499	56.1622	56.3187	0.1565	22.2449	14.3184	6.32019				73.7075	81.7205	6.18888				4.04759	3.96108	0.977545
				2a	B	59.0633	59.3578	0.2945	59.9583	63.4383	3.48	61.1106	61.3313	0.2207	7.37135	-2.50991					87.1045	62.102					5.52413	2.12614
				3a	C	60.032	60.4742	0.4422	68.8998	72.422	3.5222	53.9338	54.0682	0.1344	10.7885	32.9526					85.9325	100.231					3.27901	5.20046
				4	D	52.3972	52.8648	0.4676	57.3784	60.8432	3.4648	58.5375	58.6595	0.122	11.5331	0.3223					85.4578	0.1005					3.00908	0.3862
				5a	E	61.9552	62.7542	0.799	57.5084	60.6143	3.1059	62.058	62.2184	0.1604	19.6541						76.4003						3.94559
		Silty Loam	field fresh	1a	A	98.3455	98.5585	0.213	70.595	73.1268	2.5318	29.3936	29.6353	0.2417	7.13209	6.58682	2.84784	0.660418	0.491353	0.109678	84.7748	86.3108	2.85487	0.669379	0.720208	0.067652	8.09309	7.1024	1.19867	0.976929	0.51556	0.459179
				2a	B	42.2472	42.3964	0.1492	58.8866	62.2891	3.4025	35.1545	35.3718	0.2173	3.95861	2.20152					90.2759	80.5092					5.76546	2.87002
				3	C	49.7888	50.0149	0.2261	52.74	56.3319	3.5919	23.905	24.2564	0.3514	5.42284	10.0904					86.1491	91.8842					8.42807	11.2269
				4a	D	33.0416	33.2238	0.1822	56.351	59.4449	3.0939	26.8989	27.1539	0.255	5.15987	0.8923					87.6186	0.9228					7.22155	0.093
				5	E	56.5181	56.9673	0.4492	58.6304	61.9308	3.3004	23.6608	23.9003	0.2395	11.2607						82.7355						6.00386
			0 weeks	1	A	63.229	63.5377	0.3087	70.5954	74.0665	3.4711	24.521	24.8117	0.2907	7.58383	7.58517	3.98017				85.2745	85.3312	4.03446				7.14163	7.0836	0.740773
				2a	B	57.0172	57.6231	0.6059	97.5679	100.918	3.3503	28.1597	28.4642	0.3045	14.2207	0.239137					78.6326	82.5131					7.14671	5.74516
				3a	C	55.4343	55.6169	0.1826	42.2468	45.6707	3.4239	27.2211	27.5449	0.3238	4.64596	11.9907					87.1155	89.8769					8.23856	7.98764
				4	D	98.3455	98.5188	0.1733	35.1483	38.7109	3.5626	26.3828	26.6342	0.2514	4.3463	0.08988					89.3487	0.2418					6.30502	0.3443
				5a	E	45.8649	46.1498	0.2849	49.7882	53.2364	3.4482	27.3936	27.6568	0.2632	7.12909						86.2848						6.58609
			1 week	1a	A	58.5813	58.9986	0.4173	58.8849	62.0199	3.135	29.3934	29.7189	0.3255	10.7613	7.801	2.46242				80.8448	85.5802	3.35101				8.39393	6.6188	1.04424
				2	B	39.6587	39.8588	0.2001	56.6368	60.568	3.9312	27.8405	28.0874	0.2469	4.57037	1.53771					89.7903	79.5915					5.6393	5.78139
				3a	C	70.1175	70.5338	0.4163	52.7397	56.4411	3.7014	23.9046	24.1846	0.28	9.46631	14.2235					84.1667	91.7921					6.36696	6.91239
				4	D	70.726	70.9864	0.2604	57.2818	60.8897	3.6079	26.8986	27.167	0.2684	6.29487	0.5392					87.2169	0.812					6.48826	0.1517
				5a	E	50.7493	51.0372	0.2879	58.6303	61.7553	3.125	28.8295	29.0553	0.2258	7.91217						85.8823						6.20551
			4 weeks	1	A	58.5767	58.7134	0.1367	63.2246	66.4617	3.2371	24.5212	24.7896	0.2684	3.75323	4.11707	1.14484				88.8776	89.272	1.29543				7.36917	6.61093	0.748677
				2a	B	41.7448	41.9836	0.2388	57.0149	60.5682	3.5533	28.1605	28.4369	0.2764	5.86949	2.94212					87.3369	86.6649					6.79366	6.6415
				3a	C	70.1134	70.2543	0.1409	55.4303	58.6056	3.1753	27.2216	27.4636	0.242	3.95987	5.10508					89.2389	92.5654					6.80119	6.897
				4	D	70.7216	70.8963	0.1747	127.15	130.826	3.676	26.3832	26.601	0.2178	4.29397	0.5632					90.3527	0.5052					5.35332	0.6902
				5a	E	50.7461	50.8555	0.1094	117.248	120.905	3.6572	27.3934	27.6655	0.2721	2.70879						90.5539						6.73732
				1.5xIQR test
				Shapiro-Wilk test
				Outliers
