# Supplementary material for: The incubation history of soil samples strongly affects the occlusion of particulate organic matter
Source: Copernicus journal article supplement (doi:10.5194/bg-22-4679-2025), 2025-09-15
Supplement: Supplementary file [file bg-22-4679-2025-supplement-title-page.pdf › bg-22-4679-2025-supplement-title-page.pdf]

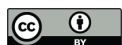

*Supplement of*

## **The incubation history of soil samples strongly affects the occlusion of particulate organic matter**

**Frederick Büks et al.**

*Correspondence to:* Frederick Büks ([frederick.bueks@tu-berlin.de](mailto:frederick.bueks@tu-berlin.de))

- [bg-22-4679-2025-supplement-title-page.pdf](#)
- [Supplements.xlsx](#)

The copyright of individual parts of the supplement might differ from the article licence.
